# Supplementary material for: Cone and rod photoreceptor transplantation in models of the childhood retinopathy Leber congenital amaurosis using flow-sorted Crx-positive donor cells
Source: PubMed Central journal article supplement — Hum Mol Genet. 2010 Sep 21;19(23):4545–59. doi: 10.1093/hmg/ddq378 (PMC2972691; doi:10.1093/hmg/ddq378), 2010-09-21

## Supplementary Figures

### Fig. S1. Developmental expression profile of the CrxGFP transgene

**A-D**, Analysis of CrxGFP expression and Rxry immunostaining during retinal histogenesis. **A**, GFP fluorescence is first detectable at E13.5 and localises to the outer aspects of the neuroblastic layer (NBL). **B**, At E15.5 the majority of the CrxGFP photoreceptor precursor cells co-label with Rxry (Rxry/GFP<sup>+</sup>). **C**, At E17.5 the GFP layer of developing photoreceptors has increased and the proportion of Rxry/GFP<sup>+</sup> cells remains high. **D**, By P3 only a small percentage of CrxGFP photoreceptors are positive for Rxry. The percentage of Rxry<sup>+</sup> cells within the GFP<sup>+</sup> population was determined by averaging 10 fields of view per timepoint; these data indicate the relative ratios of cone to rod precursors as 3: 1, 2.2: 1 and 1: 15.6 at E15.5, E17.5 and P3 respectively. **E**, The mitotic marker pH3 labels retinal progenitor cells (open arrowheads) at the ventricular surface and does not co-label CrxGFP precursor cells. **A-E**, Hoechst nuclear stain (blue); **A'-E'**, CrxGFP labelling (green); **A''-E''**, Rxry and pH3 immunostaining (red); **A'''-E'''** three channel merge. NBL – neuroblastic layer, ONBL – outer neuroblastic layer, GCL – ganglion cell layer.

### Fig. S2. CrxGFP expression in bipolar cells

**A**, Adult retinal section showing CrxGFP expression in the ONL and weak expression in the INL. **B-D**, CrxGFP cells in the subretinal space of recipient wildtype retina, 3 weeks after transplantation showing the presence of some Chx10 and PKC $\alpha$  positive cells (open

arrowheads). Cells that integrated into the ONL did not express these bipolar markers. Hoechst nuclear stain (blue). SRS – subretinal space, ONL – outer nuclear layer.

**Fig. S3. Post mitotic CrxGFP cells integrate into the recipient ONL**

**A, B**, CrxGFP cells in the subretinal space of recipient wildtype retina, 3 weeks after transplantation of P3 donor cells. **A**, Transplanted cells that did not integrate into the ONL, accumulated in the subretinal space and show presence of some BrdU positive cells (solid arrowheads). **B**, A micrograph displaying both non integrated BrdU positive cells in the subretinal space (**B'**, open arrowhead) and integrated CrxGFP BrdU negative cells in the ONL (**B**, closed arrowheads). No integrated cell in the ONL co-labelled for BrdU. SRS – subretinal space, ONL – outer nuclear layer.

**Fig. S4. Expression of synaptic markers in integrated CrxGFP photoreceptor cells.**

**A-C**, CrxGFP labelling (grey scale), **A'-C'** target protein immunostaining (red), **B''-D''** three channel merge with CrxGFP (green) and Hoechst nuclear stain (blue). **A, B**, Transplanted CrxGFP cells co-express the ribbon synapse marker Bassoon (arrowheads) and the synaptic marker Dystrophin. Insets show higher magnification and single optical sections of the small boxed areas in **A, B**. **C**, PKC $\alpha$  labels rod bipolar cells. Inset shows close association of the rod spherule (green) and the bipolar terminal (red). All retinae were examined 3 wks post transplantation. **A-C** are confocal z-projections. INL – inner nuclear layer, ONL – outer nuclear layer, OPL – outer plexiform layer.

**Fig. S5. Transplanted CrxGFP cells remaining in the subretinal space express cone markers**

**A, B**, View of transplanted CrxGFP cells that did not integrate into the ONL and accumulated in the subretinal space of a recipient eye. **A**, Subretinally located CrxGFP cells express the nuclear cone marker Rxry (solid arrowheads) and the cells organise in rosettes (dashed ellipse). **B**, CrxGFP cells in the sub retinal space also express the mature cone marker cone arrestin (Arr3) (solid arrowheads), as seen in cones in the recipient ONL (open arrowheads). **C**, CrxGFP cells in the sub retinal space express the mature rod marker phosducin (solid arrowheads), as seen in rods in the recipient ONL. **D**, CrxGFP/Rxry-positive cells observed after flow sorting. Arrowhead indicates a Rxry-negative cell. All retinae were examined 3 wks post transplantation. SRS – subretinal space, ONL – outer nuclear layer, RPE – retinal pigmented epithelium.

**Fig. S6. Rxry labels developing cones**

**A-C**, Confocal z-projections of CrxGFP retinae at E15.5, P0 and P21 that received a BrdU-pulse at E14. Photoreceptor cells born after the BrdU pulse colabel for BrdU and CrxGFP; developing cone photoreceptors are identified by Rxry immunostaining. **D**, Pulse chase time course. **E**, Graph of the percentage of Rxry-positive cells (+/- standard deviation) within the CrxGFP/BrdU positive population after each chase period at E15.5, P0 and P21 indicating that the majority of CrxGFP cells born early in retinogenesis develop as cone photoreceptors. N=number of retinae, n= number of cells. ONBL – outer neuroblastic layer, ONL – outer nuclear layer.

**Fig. S7. Transplantation of embryonic CrxGFP photoreceptor precursors into P14 and adult wildtype recipient mice**

**A**, Comparison of the cone integration efficiency of E15.5 CrxGFP donor cells transplanted into 6 weeks (n=7) (adult) and P14 wild-type (n=10) recipient retinæ. No statistically significant difference was observed (Mann Whitney,  $p = 0.107$ ).

**B**, CrxGFP Rxry-positive cone precursors within the inner and outer segment layer apparently migrating towards the recipient ONL at 4 days after transplantation of E15.5 CrxGFP donors into the adult.

**Fig. S8. The *Gucy2e*<sup>-/-</sup> retina shows reduced Rxry staining and is severely cone dystrophic by 2 months of age**

**A**, *Gucy2e*<sup>-/-</sup> central retina at 2 months of age. Cone nuclei are labelled by Rxry immunostaining at the outer aspect of the ONL (arrowheads). The number of cones is severely reduced (approximately four-fold) compared to wild-type, ONL-thinning is not apparent at this age. **B**, A control wild-type retina displaying a normal cone distribution visualised by Rxry immunostaining. **C**, Bar chart comparing the amount of Rxry<sup>+</sup> nuclei per field of view between the mutant and wild-type retina. ONL – outer nuclear layer, INL – inner nuclear layer, GCL – ganglion cell layer.

**Supplementary Video 1. Transplants of CrxGFP precursor cells generate new cone photoreceptors**

The video is a 360° rotation of a confocal stack, showing a cone photoreceptor generated from transplants of E15.5 CrxGFP cells into wildtype retina. The cone (green) co-labels with Rxry (red); displays inner and outer segment, as well as a cone pedicle including

telodendria. The nucleus is differentiated from surrounding rods by multiple distinct heterochromatin foci (nuclear stain, blue).

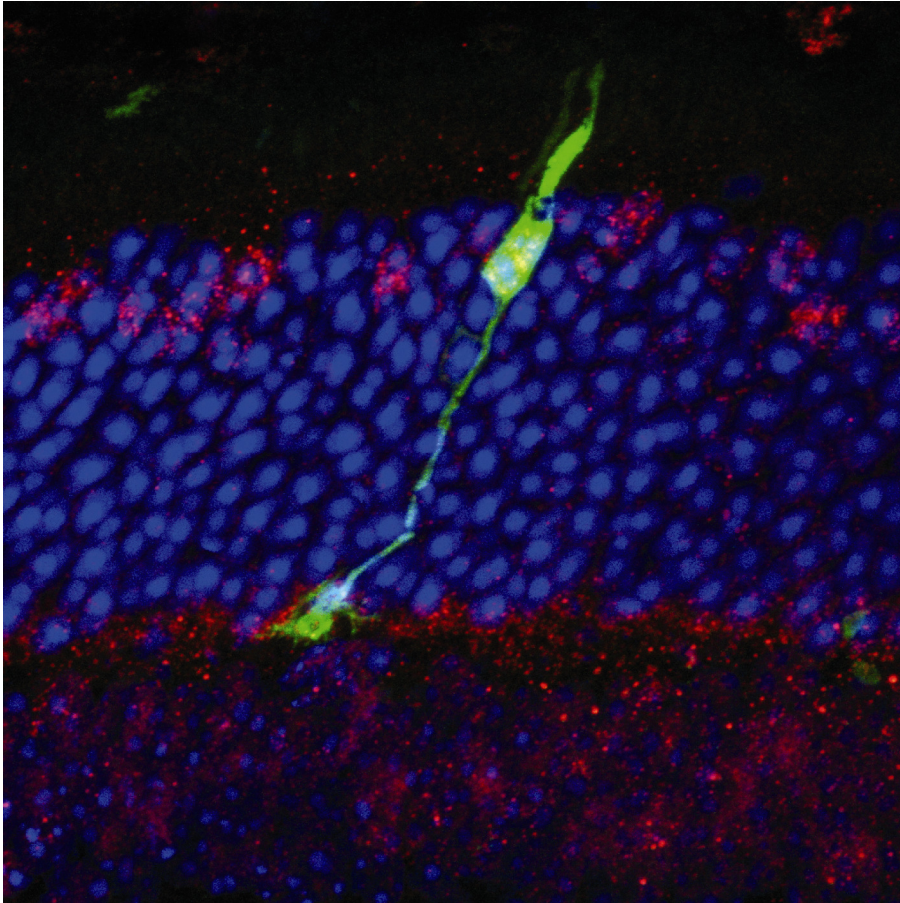

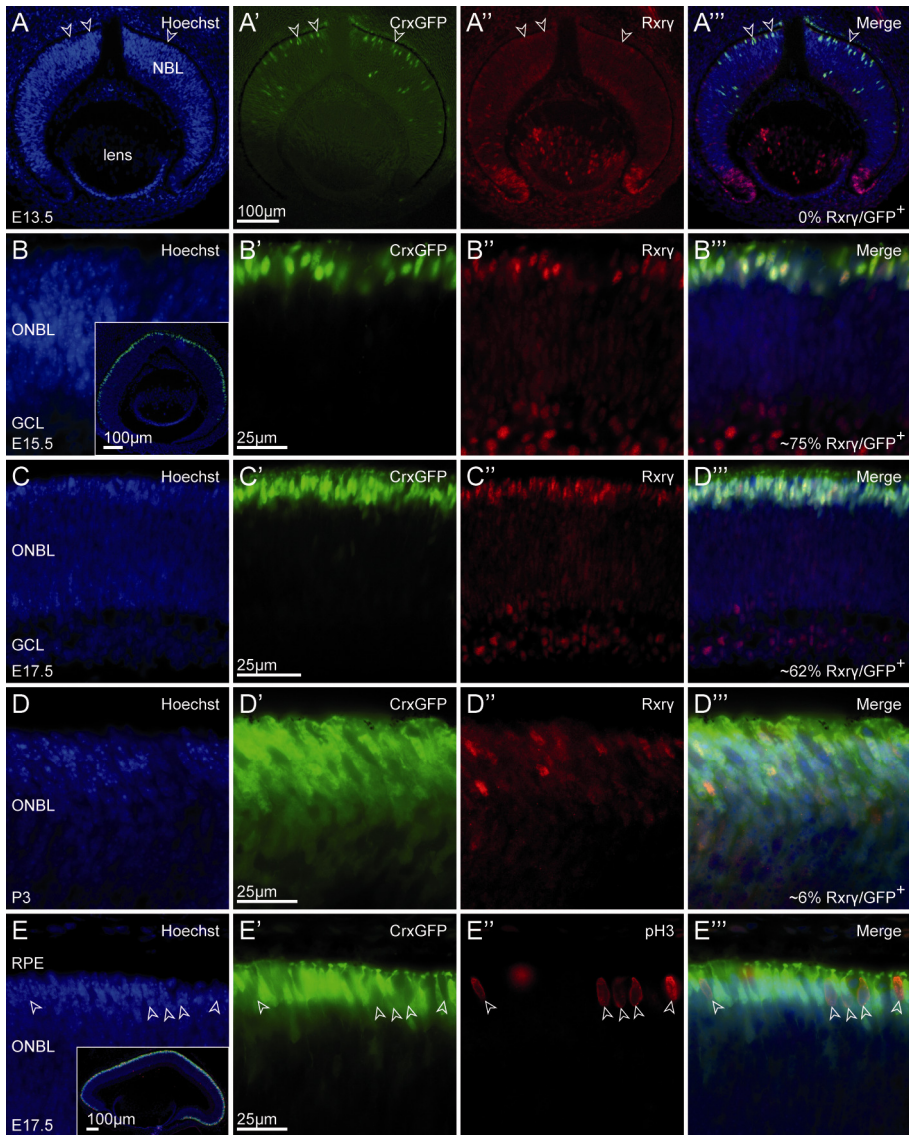

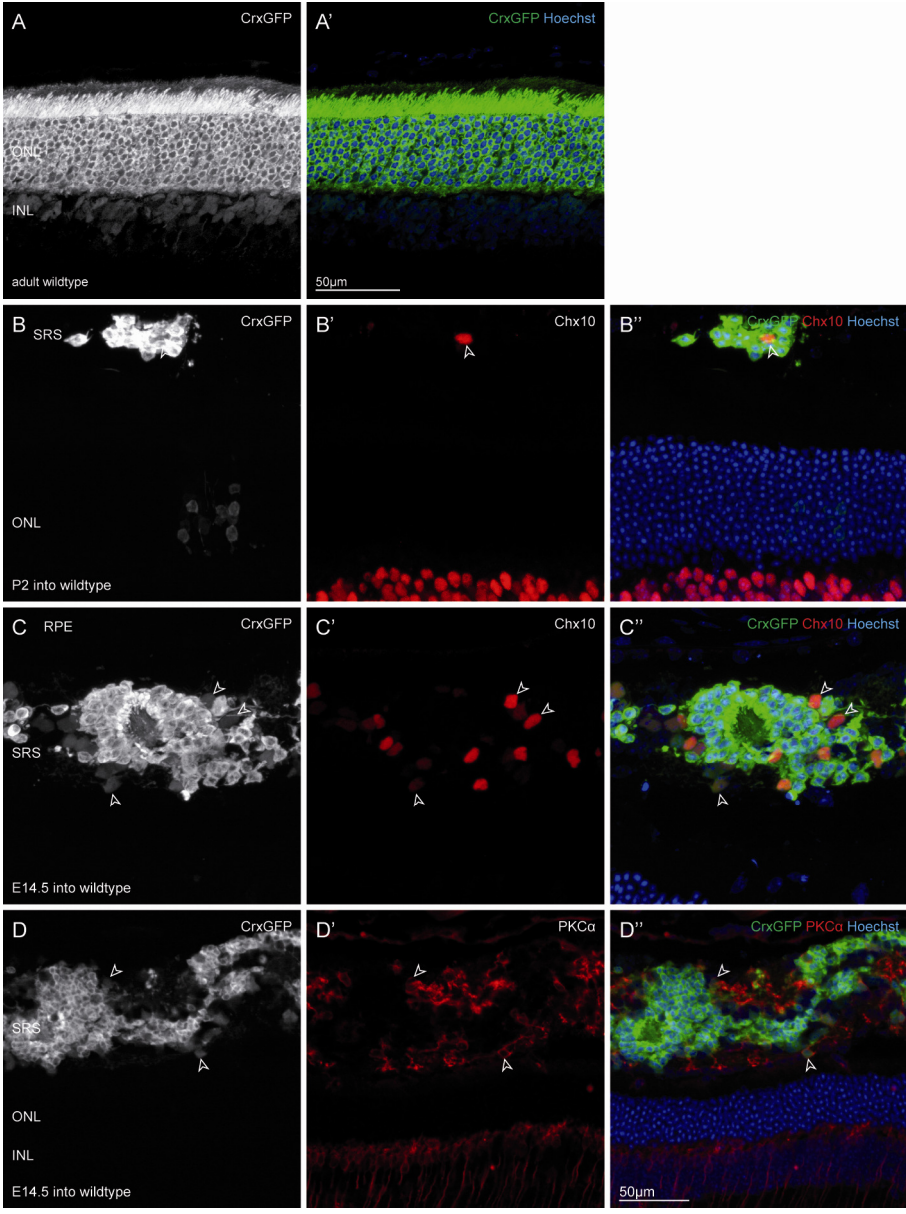



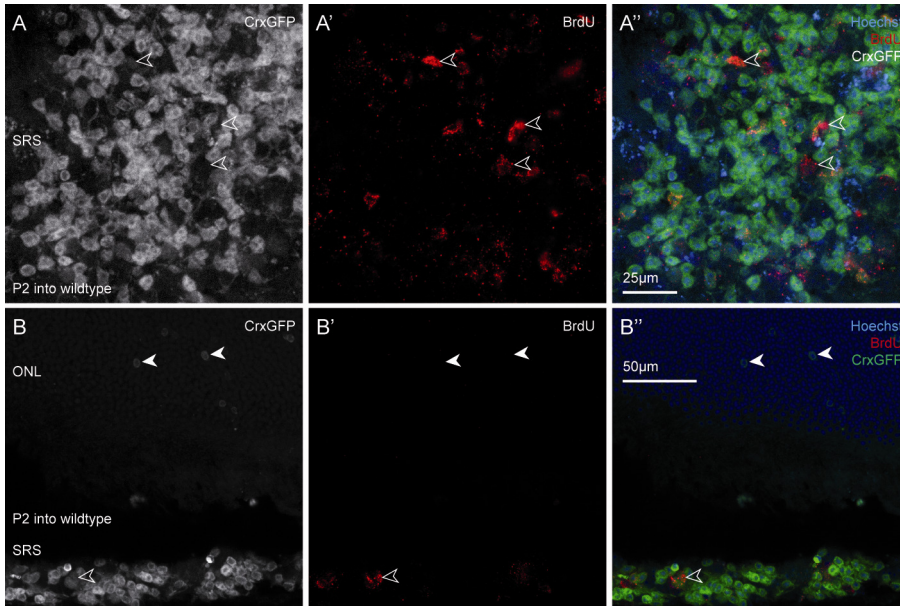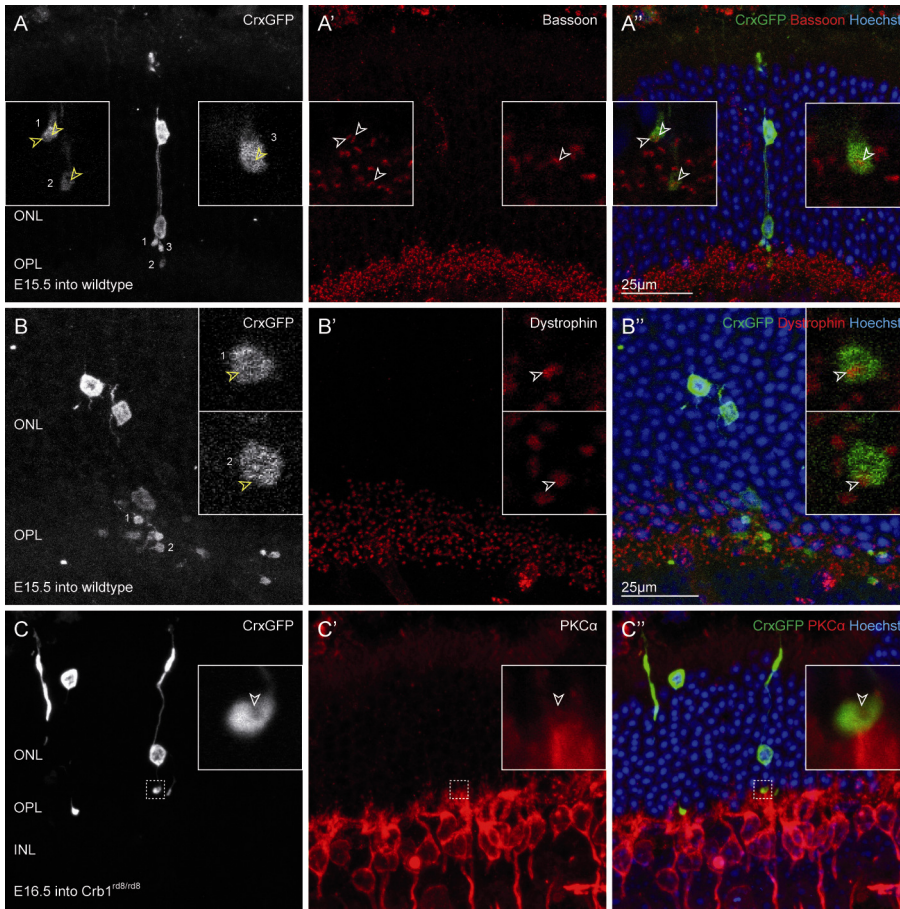



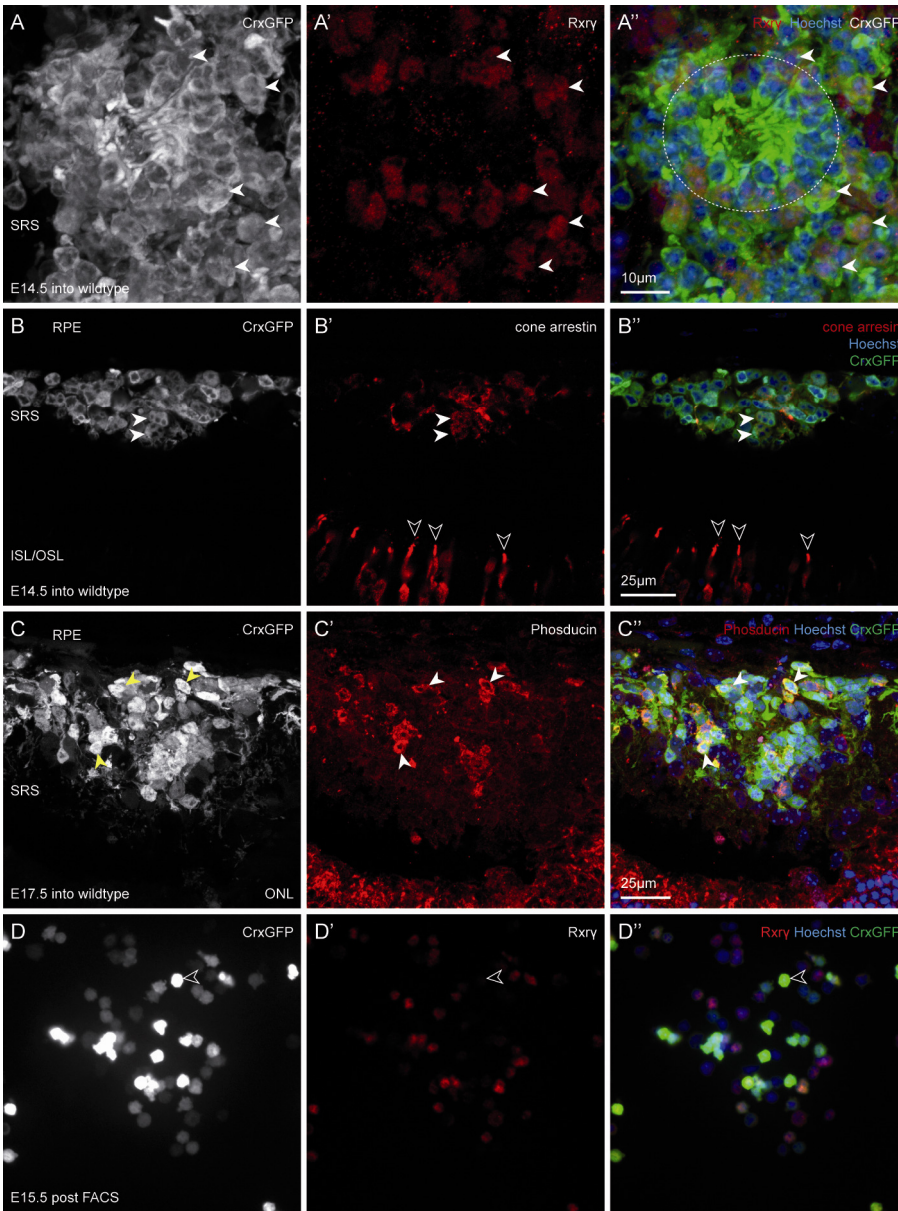

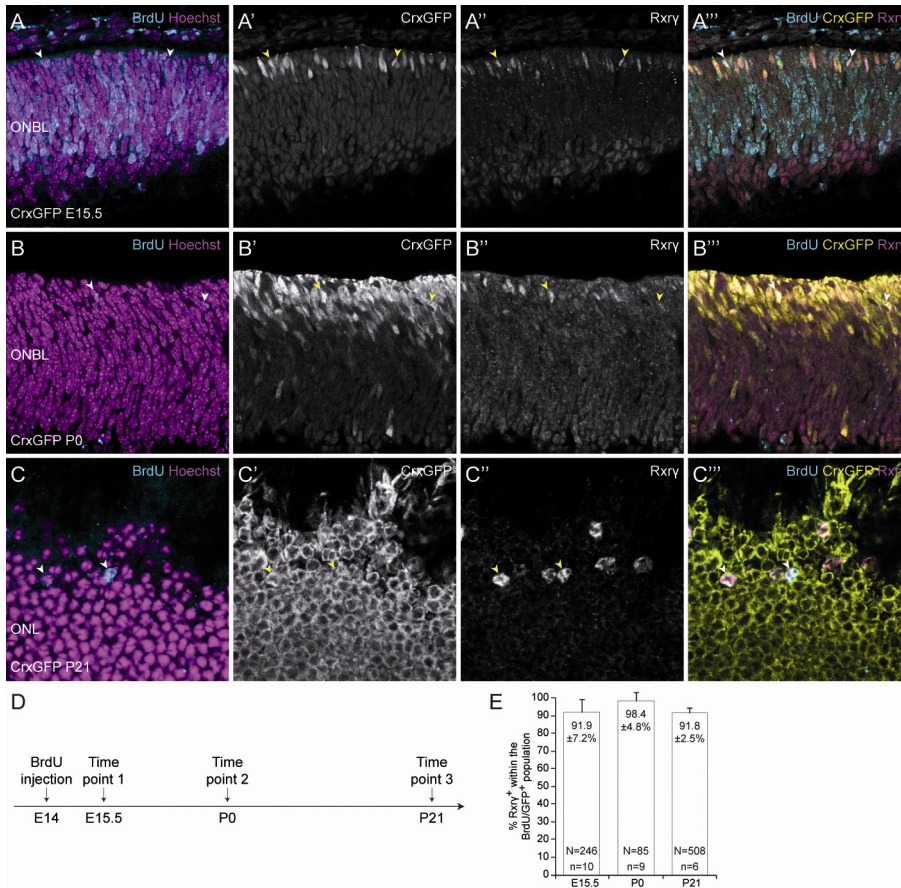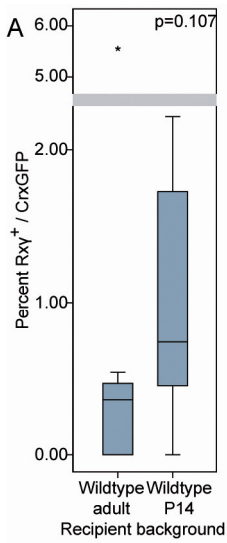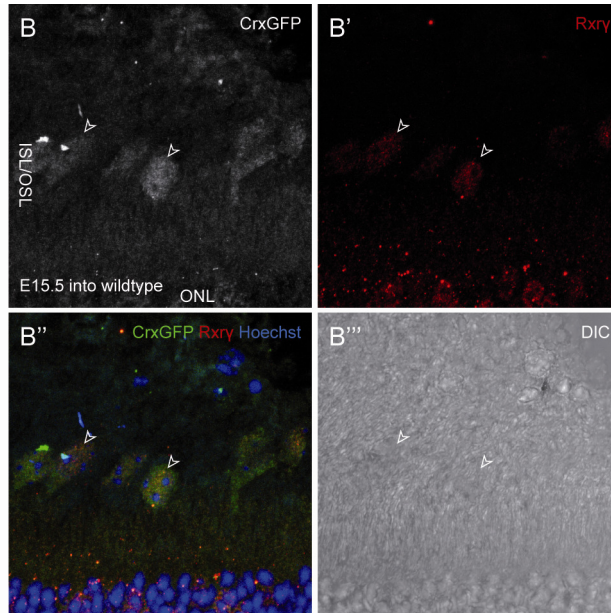

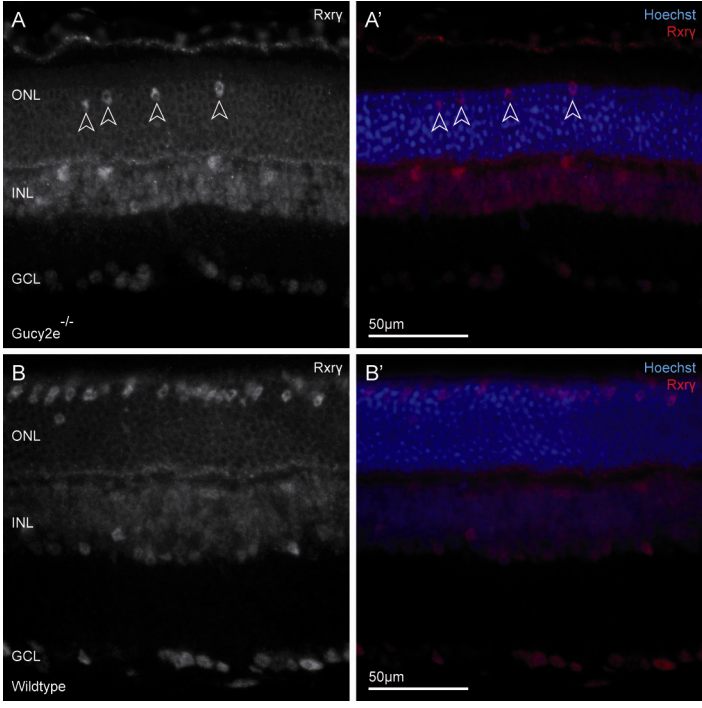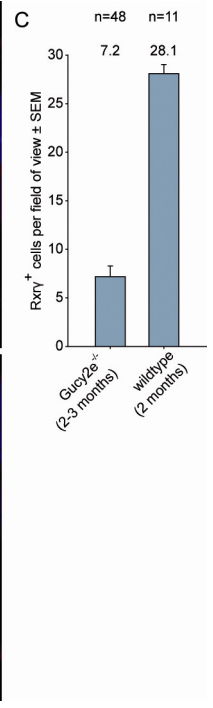

Supplement: supp_ddq378_ddq378supp_figs.pdf [file supp_ddq378_ddq378supp_figs.pdf]
